# Supplementary material
Source: MDPI journal article supplement (https://www.mdpi.com/2077-1312/10/3/391)
Supplement: s1 [file s1]

Archive with 2 entries (2 files):
- Movie_S1.mp4
- Supplementary Materials Scucchia et al_Proof.pdf
